# Supplementary material for: Facile synthesis of MgAl layered double hydroxides by a co-precipitation method for efficient nitrate removal from water: kinetics and mechanisms
Source: Royal Society of Chemistry journal article supplement (doi:10.1039/d1nj02035h), 2021-01-01
Supplement: d1nj02035h1.pdf [file d1nj02035h1.pdf]

## Supplementary Information

### Facile synthesis of MgAl layered double hydroxides by co-precipitation method for efficient nitrate removal from water: Kinetics and mechanisms

Zhuwu Jiang<sup>1,2</sup>, Jiangnan Wu<sup>1</sup>, Xinru Liu<sup>1</sup>, Hai Yu<sup>1</sup>, Chengyuan Jiao<sup>1</sup>, Junhong  
Shen<sup>1</sup>, Yanyan Pei<sup>1\*</sup>

<sup>1</sup> College of Ecological Environment and Urban Construction, Fujian University of  
Technology, Fuzhou, Fujian, 350118, China

<sup>2</sup> College of Civil Engineering, Fuzhou University, Fuzhou 350116, China

\*Corresponding authors.

E-mail address: [peiyanyan715@outlook.com](mailto:peiyanyan715@outlook.com) (Y. Pei)

**Fifteen Expressions and One Figure Included**  
**(Expression 1-14 and Figure S1)**

The calculation expressions related to adsorption is as follows:

$$RE=(C_0-C_t)/C_0 \quad (1)$$

$$Q_t = (C_0-C_t)V/m \quad (2)$$

$$Q_e = (C_0-C_e)V/m \quad (3)$$

Where  $RE$  is removal rate,  $C_0$  is the  $\text{NO}_3^-$  initial concentration ( $\text{mg}\cdot\text{L}^{-1}$ ),  $C_t$  and  $C_e$  are the  $\text{NO}_3^-$  concentration at time  $t$  and equilibrium ( $\text{mg}\cdot\text{L}^{-1}$ ),  $m$  is the mass of adsorbent (g),  $V$  is the volume of the aqueous solution (L),  $Q_t$  and  $Q_e$  are the adsorption capacity at time  $t$  and equilibrium ( $\text{mg}\cdot\text{g}^{-1}$ ).

Pseudo-first-order model:

$$Q_t = Q_e(1-e^{-k_1t}) \quad (4)$$

Pseudo-second-order model:

$$Q_t = k_2Q_e^2t/(1+k_2Q_et) \quad (5)$$

Intraparticle diffusion model:

$$Q_t = k_it^{0.5}+C \quad (6)$$

Where  $k_1$  ( $\text{min}^{-1}$ ),  $k_2$  ( $\text{g mg}^{-1} \text{min}^{-1}$ ),  $k_i$  ( $\text{mg g}^{-1} \text{min}^{-1/2}$ ) are the rate constant individually for the corresponding model in the Exp 4-6,  $C$  ( $\text{mg g}^{-1}$ ) is the intercept.

Langmuir model:

$$Q_e = Q_mK_LC_e/(1+K_LC_e) \quad (7)$$

Freundlich model:

$$Q_e = K_F C_e^n \quad (8)$$

Temkin model:

$$Q_e = b_T \ln(K_T C_e) \quad (9)$$

D-R model:

$$Q_e = Q_m e^{(-K_{D-R}\varepsilon^2)} \quad (10)$$

$$E = RT \ln(1+1/C_e) \quad (11)$$

$$E = 1/(2K_{D-R}^{1/2}) \quad (12)$$

Where  $C_e$  is the equilibrium concentration ( $\text{mg}\cdot\text{L}^{-1}$ ),  $Q_m$  is the maximum adsorption capacity ( $\text{mg}\cdot\text{g}^{-1}$ ),  $K_L$  is the adsorption equilibrium constant of Langmuir adsorption isotherm mode ( $\text{L}\cdot\text{mg}^{-1}$ ),  $K_F$  is the empirical constant of Freundlich model ( $\text{mg}\cdot\text{g}^{-1}$ ),  $K_T$  is the equilibrium binding constant ( $\text{L}\cdot\text{mg}^{-1}$ ),  $b_T$  is the Temkin constant ( $\text{J}\cdot\text{mol}^{-1}$ ),  $K_{D-R}$  is the constant of D-R model ( $\text{mol}^2\cdot\text{J}^{-2}$ ),  $\varepsilon$  is the Polanyi adsorption potential energy ( $\text{J}\cdot\text{mol}^{-1}$ ),  $E$  is the adsorption free energy ( $\text{kJ}\cdot\text{mol}^{-1}$ ).

Van't Hoff equation:

$$\Delta G^\circ = -RT\ln(Q_e/C_e) \quad (13)$$

Gibbs-Helmholtz equation:

$$\Delta G^\circ = \Delta H^\circ - T\Delta S^\circ \quad (14)$$

Where  $\Delta G^\circ$  is the free energy change ( $\text{kJ mol}^{-1}$ ),  $R$  is the universal gas constant ( $8.314 \text{ kJ mol}^{-1} \text{ K}^{-1}$ ),  $T$  is the absolute temperature (K),  $\Delta H^\circ$  is the enthalpy change ( $\text{kJ mol}^{-1}$ ),  $\Delta S^\circ$  is the entropy change ( $\text{kJ mol}^{-1} \text{ K}^{-1}$ ).

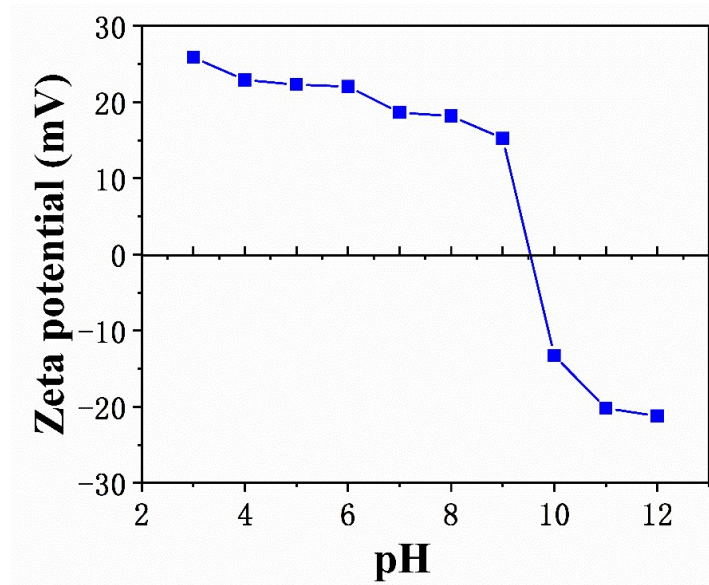

**Fig. S1.** Zeta potential of  $Mg_5Al$ -LDH.
